# Supplementary material for: Protective and Detoxifying Enzyme Activity and ABCG Subfamily Gene Expression in Sogatella furcifera Under Insecticide Stress
Source: Front Physiol. 2019 Jan 8;9:1890. doi: 10.3389/fphys.2018.01890 (PMC6331518; doi:10.3389/fphys.2018.01890)
Supplement: Supplementary file 1 [file Data_Sheet_1.docx]

**Supplementary Material**

**Effects of Insecticides on** [**Protective**](http://cn.bing.com/dict/search?q=Protective&FORM=BDVSP6&mkt=zh-cn)**and Detoxifying Enzyme Activity, and Expression of ABCG subfamily, *Sogatella furcifera***

**Cao Zhou1, Hong Yang1, 2*, Zhao Wang1, 3, Gui-yun Long1, and Dao-chao Jin1**

1Institute of Entomology, Guizhou University; Provincial Key Laboratory for Agricultural Pest Management of Mountainous Regions, Guiyang 550025, People’s Republic of China

2College of Tobacco Science of Guizhou University, Guiyang, 550025, People’s Republic of China

3College of Environment and Life Sciences, Kaili University, Kaili, 556011, People’s Republic of China

*** Correspondence:**

Pro. Hong Yang

maximus@gmail.com

E-mail address: [axyridis@163.com](mailto:axyridis@163.com)

Supplementary Table S1. LC10 and LC25 values of thiamethoxam, abamectin, and buprofezin against *Sogatella furcifera*.

| Insecticides | LC10 values (mg/L) | LC25 values (mg/L) |
| --- | --- | --- |
| Thiamethoxam | 0.0332 | 0.1428 |
| Abamectin | 1.0446 | 2.1551 |
| Buprofezin | 0.1186 | 0.3478 |

Supplementary Table S2. The primers of ABC transporter G subfamily gene and 18S gene for RT-qPCR.

| Gene | Forward (5′–3′ ) | Reverse (5′–3′ ) |
| --- | --- | --- |
| *SfABCG1* | ATCTTCCTCGATGAGCCAACCA | CGGAGTGTGGATGGAGCAGAT |
| *SfABCG2* | TTGCCATGTCCAGGAGGAGTAG | GGTGACGGCTGCTAGTTGATG |
| *SfABCG3* | TCAAGGCGGACGCACAATAGT | AGGCTGTGAGTGGCAAGGAAG |
| *SfABCG4* | TTGAGCTTCTCACTGAGCCTTC | GCACACCACCATCACTCCTT |
| *SfABCG5* | CACGCCAGTCAGCAGCATT | CGGCATCTGTTGTCTGAGAGG |
| *SfABCG6* | GTTACCGTGTCCGACCTACCA | CCGTTCTCTGTTCCATCCACAA |
| *SfABCG7* | GGCTCGGTGAAGGTGAACATC | CCTCGGACACGGAGTAGTTGA |
| *SfABCG8* | TCCGCCGATCCTGTTCCTTGA | GCAAACGATTGTGTGCCCTTCA |
| *SfABCG9* | CGAGATGAGGCAAGGTTCAGGA | TTGAGTAGGGCGGCAAAGTTCA |
| *SfABCG10* | TCAGGTGGCAAGACGCAGTGTA | TGGCTCGTCCAGGAGGAGTAGA |
| *SfABCG11* | GACAGCTCCAGCACCGTTCA | AACACATCGTCCGCCGTTGAT |
| *SfABCG12* | CAGCCATCTACAGAGCCTAGCA | CTCGCCGTCAGACAGCAAGT |
| *SfABCG13* | GCTGGAAGAGGCGGATATGCT | TTGGGCGTGGGACAGTGAGT |
| *SfABCG14* | AGGAGTATGGTGAGCCGCAATG | AGGGCGATCAGTTCTCCAGGAT |
| *SfRPL9* | GGGCGAGAAGTACATCCGTAGG | GCGGCTGATCGTGAGACATCTT |
